# Supplementary material for: Lisdexamphetamine versus methylphenidate for paediatric patients with attention-deficit hyperactivity disorder and type 1 diabetes (LAMAinDiab): protocol for a multicentre, randomised cross-over clinical trial in an outpatient telemedicine-supported setting
Source: PubMed Central journal article supplement — BMJ Open. 2023 Dec 12;13(12):e078112. doi: 10.1136/bmjopen-2023-078112 (PMC10728970; doi:10.1136/bmjopen-2023-078112), 2023-12-12
Supplement: bmjopen-2023-078112supp001.pdf [file bmjopen-2023-078112supp001.pdf]

- 1 **Supplementary Table 1.** Study schedule. The order of treatment (A/B) will be decided at randomization (allocation step). Names of visits corresponding to  
 2 Figure 1 are included.

|              |                                                                          | STUDY PERIOD               |             |                            |                            |                             |                            |                             |                             |                                             |
|--------------|--------------------------------------------------------------------------|----------------------------|-------------|----------------------------|----------------------------|-----------------------------|----------------------------|-----------------------------|-----------------------------|---------------------------------------------|
|              |                                                                          | Enroll                     | PT          | Allocate                   | Post-allocation            |                             |                            |                             |                             |                                             |
| DURATION     |                                                                          | 1 week                     | 10-22 weeks | 1 week                     | First treatment (6 months) |                             |                            | Second treatment (6 months) |                             |                                             |
| ENROLLMENT   | Eligibility screen                                                       | X                          |             | X                          |                            |                             | X                          |                             |                             |                                             |
|              | Informed consent                                                         | X                          |             |                            |                            |                             |                            |                             |                             |                                             |
|              | Randomization (to A/B)                                                   |                            |             | X                          |                            |                             |                            |                             |                             |                                             |
| INTERVENTION | Parent training in behaviour management                                  |                            | X           |                            |                            |                             |                            |                             |                             |                                             |
|              | Cross-over                                                               | MPH                        |             |                            | A                          | A                           | A                          | B                           | B                           | B                                           |
|              |                                                                          | LDX                        |             |                            |                            | B                           | B                          | B                           | A                           | A                                           |
| ASSESSMENTS  | Conners 3, PedsQL questionnaires                                         | Psychological evaluation 1 |             | Psychological evaluation 2 |                            | Psychological evaluation 3  | Psychological evaluation 4 |                             | Psychological evaluation 5  | Psychological evaluation 6                  |
|              | Diabetes control (HbA1c, CGM)                                            | Diabetological visit 1     |             | Diabetological visit 2     |                            | Diabetological visit 3      | Diabetological visit 4     |                             | Diabetological visit 5      | Diabetological visit 6                      |
|              | Anthropometric, BP, HR measurement                                       |                            |             |                            |                            |                             |                            |                             |                             |                                             |
|              | Urine tests, ECG with QT segment assessment, ophthalmologic consultation |                            |             |                            |                            |                             |                            |                             |                             |                                             |
|              | Psychiatric consultation                                                 |                            |             | LDX/MPH qualification      | Dose optimization          | *Additional dose adjustment |                            | Dose optimization           | *Additional dose adjustment | Referral to care under National Health Fund |

- 3 \*optional, up to the Investigator, only lowering of dose allowed
